# Supplementary material for: Synergy ascension of SnS/MoS2 binary metal sulfides on initial coulombic efficiency and stable capacity for lithium storage
Source: Royal Society of Chemistry journal article supplement (doi:10.1039/d1ra01267c), 2021-01-01
Supplement: d1ra01267c1.pdf [file d1ra01267c1.pdf]

## Supporting Information

### Synergy ascension of SnS/MoS<sub>2</sub> binary metal sulfides on initial coulombic efficiency and stable capacity for lithium storage

Kai Pan,<sup>a</sup> Yanna Sun,<sup>c</sup> Xingcun He,<sup>b</sup> Feiyan Lai,<sup>b</sup> Hongqiang Wang,<sup>c</sup> Libo Liang,<sup>b</sup>

Qingyu Li,<sup>c</sup> Xiaohui Zhang,<sup>\*b,c</sup> Hongbing Ji<sup>a</sup>

<sup>a</sup> School of Chemistry and Chemical Engineering, Guangxi Key Laboratory of Petrochemical Resource Processing and Process Intensification Technology, Guangxi University, Nanning 530004, China

<sup>b</sup> College of Materials and Environmental Engineering, Hezhou University, Hezhou 542899, China

<sup>c</sup> Guangxi Key Laboratory of Low Carbon Energy Materials, Guangxi Normal University, Guilin 541004, China

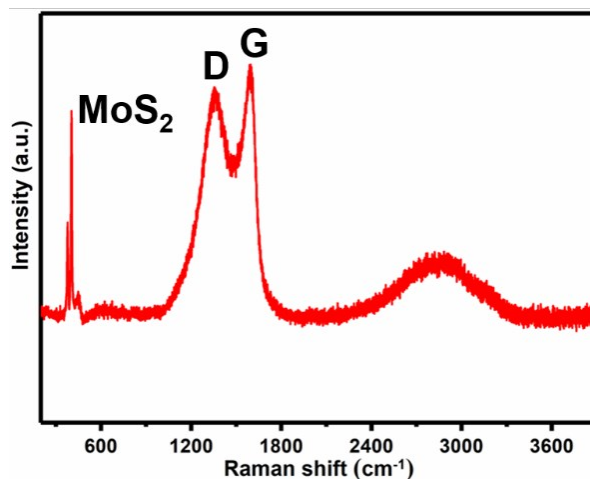

Fig. S1 Raman spectrum of the SnS/MoS<sub>2</sub>/C sample.

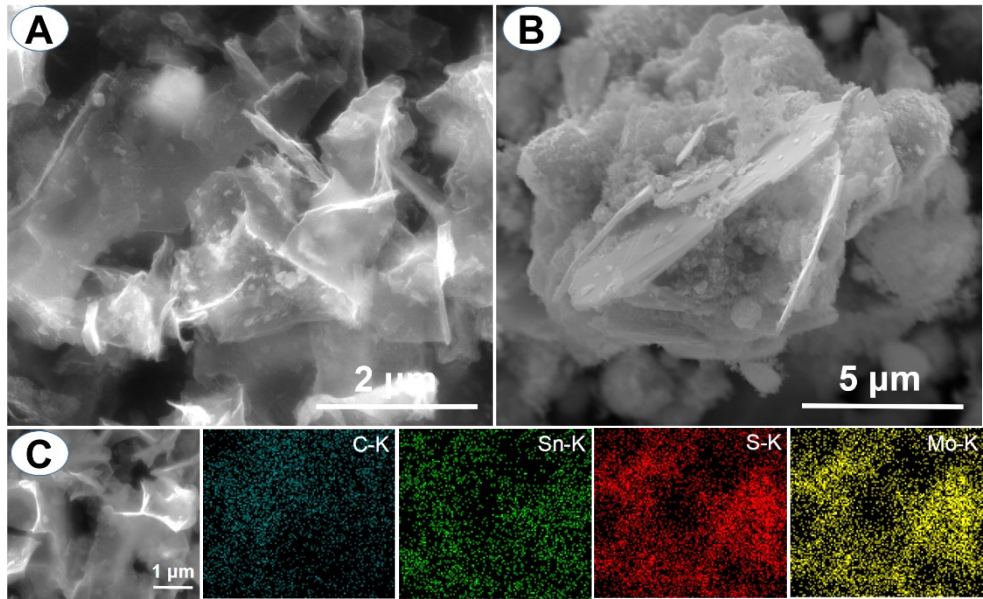

Fig. S2 SEM images of the SnS/C (A) and MoS<sub>2</sub>/C (B) samples, and EDS mapping of the SnS/MoS<sub>2</sub>/C (C).

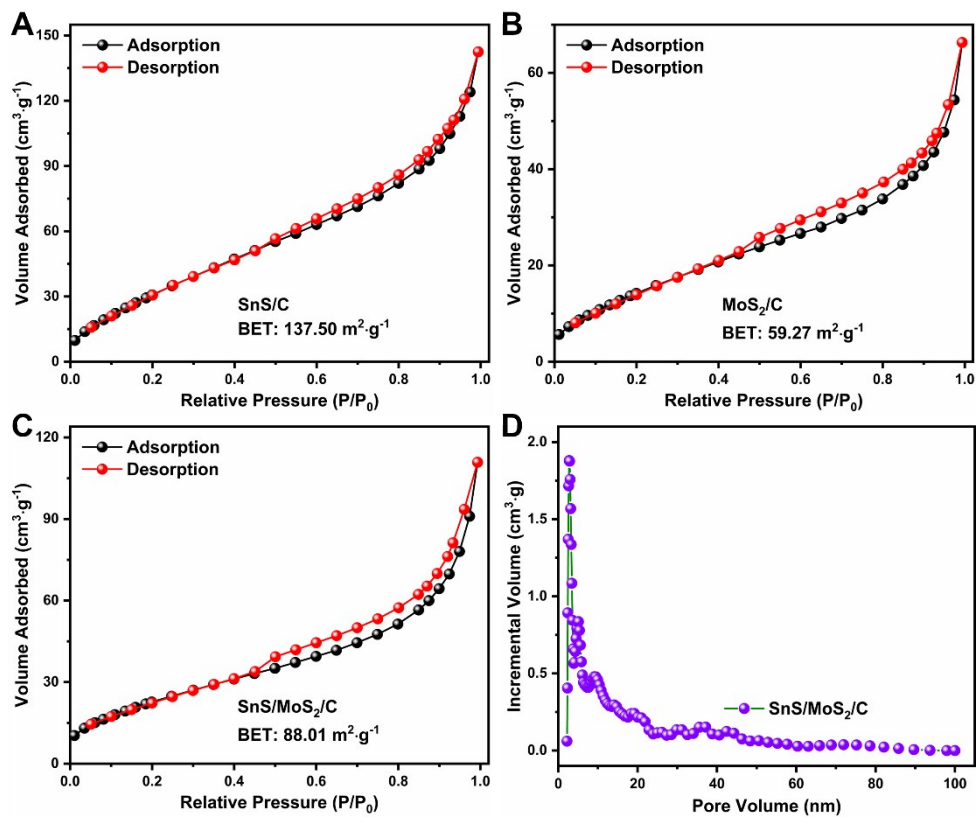

Fig. S3 Nitrogen adsorption–desorption isotherm with BET values (A, B and C) and pore size distribution (D) of the samples.

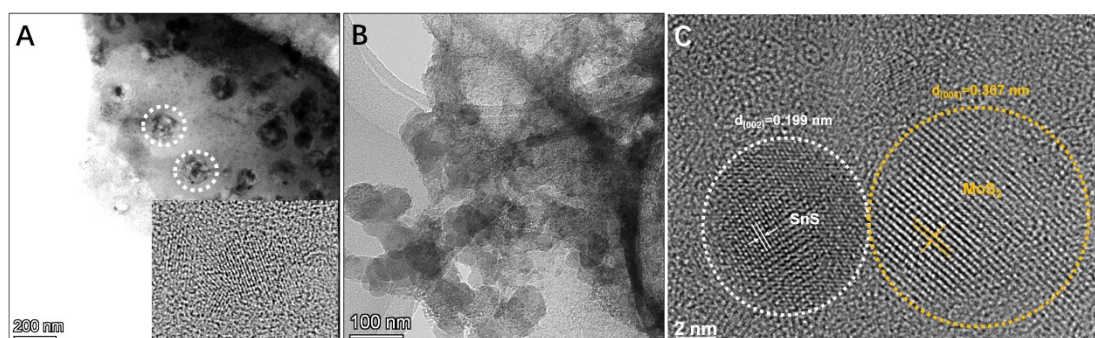

Fig. S4 TEM images of the SnS (A) and SnS/MoS<sub>2</sub>/C (B and C) samples after cycling.

**Tab. S1** Comparison of the initial coulombic efficiency of the SnS/MoS<sub>2</sub>/C with recently reported SnS-based and MoS<sub>2</sub>-based anode materials for LIBs.

| Sample                             | Initial discharge capacity (mAh·g <sup>-1</sup> ) | Initial charge capacity (mAh·g <sup>-1</sup> ) | Initial coulombic efficiency (%) | Ref       |
|------------------------------------|---------------------------------------------------|------------------------------------------------|----------------------------------|-----------|
| SnS/C                              | 1396                                              | 625                                            | 44.8                             | [1]       |
| SnS@G                              | 1895.4                                            | 1577.0                                         | 83.2                             | [2]       |
| SnS/CBC                            | 1426                                              | 971                                            | 61                               | [3]       |
| SnS@SC                             | 1449                                              | 1242                                           | 85.7                             | [4]       |
| SnS/N-C                            | 1421.6                                            | 1074.4                                         | 75.6                             | [5]       |
| NG-SnS                             | 1438                                              | 1254                                           | 88.2                             | [6]       |
| SnS/C                              | 1376                                              | 977                                            | 71                               | [7]       |
| SnS/CNT@C                          | 1131.8                                            | 1062                                           | 79.78                            | [8]       |
| MoS <sub>2</sub> @NC               | 1103.6                                            | 812.1                                          | 73.6                             | [9]       |
| FeS@MoS <sub>2</sub> /C            | 1599.8                                            | 1214                                           | 75.9                             | [10]      |
| MoO <sub>3</sub> @MoS <sub>2</sub> | 1202                                              | 920                                            | 76.6                             | [11]      |
| MoS <sub>2</sub> @C/RGO            | 1373                                              | 1189                                           | 86.6                             | [12]      |
| MoS <sub>2</sub>                   | 1076                                              | 816                                            | 75.8                             | [13]      |
| MoS <sub>2</sub> @NC               | 845.3                                             | 600.2                                          | 71                               | [14]      |
| MoS <sub>2</sub> @graphene         | 1196                                              | 835                                            | 70                               | [15]      |
| SnS/MoS <sub>2</sub> /C            | 1400                                              | 1134                                           | 81                               | [16]      |
| SnS/MoS <sub>2</sub> /C            | 1249.4                                            | 1126.3                                         | 90.2                             | This work |

## References

- [1] J. Li, M. Y. Wang, J. G. Huang, *J. Alloy. Compd.*, 2021, 860, 157897.
- [2] B. Zhao, D. Y. Song, Y. W. Ding, J. Wu, Z. X. Wang, Z. W. Chen, Y. Jiang, J. J. Zhang, *Nanoscale*, 2020, 12, 3941.
- [3] F. S. Yuan, Y. Huang, J. S. Qian, M. M. Rahman, P. M. Ajayan, D. P. Sun, *Carbohydr. Polym.*, 2021, 255, 117400.
- [4] Y. Cheng, Z. M. Wang, L. M. Chang, S. H. Wang, Q. J. Sun, Z. Yi, L. M. Wang, *ACS Appl. Mater. Inter.*, 2020, 12, 25786.
- [5] A. H. Jin, N. R. Kang, J. H. Um, I. H. Ko, M. S. Kim, K. H. Kim, S. H. Kim, S.H. Yu, Y. E. Sung, *Chem. Commun.*, 2020, 56, 8095.

- [6] S. X. Mei, W. L. An, J. J. Fu, W. Y. Guo, X. Y. Feng, X. X. Li, B. Gao, X. M. Zhang, K. F. Huo, P. K. Chu, *Electrochim Acta.*, 2020, 331, 135292.
- [7] P. Xue, N. N. Wang, Y. X. Wang, Y. H. Zhang, Y. L. Liu, B. Tang, Z. C. Bai, S. X. Dou, *Carbon*, 2018, 134, 222.
- [8] H. Q. Wang, D. Q. Huang, Z. X. Yan, Q. C. Pan, F. H. Zheng, Y. G. Huang, Q. Y. Li, *J. Alloy. Compd.*, 2020, 821, 153551.
- [9] Y. G. Huang, Y. Wang, X. H. Zhang, F. L. Lai, Y. N. Sun, Q. Y. Li, H. Q. Wang, *Mater. Lett.*, 2019, 243, 84.
- [10] H. Q. Wang, C. Ji, Y. Wang, X. H. Zhang, Y. G. Huang, Q. Y. Li, *Energy. Technol-Ger.*, 2019, 7, 1801132.
- [11] S. P. Zhao, Z. L. Zha, X. Liu, H. X. Tian, Z. Y. Wu, W. F. Li, L. B. Sun, B. Liu, Z. G. Chen, *Energ. Fuel.*, 2020, 34, 11498.
- [12] S. C. Li, P. Liu, X. B. Huang, Y. G. Tang, H. Y. Wang, *J. Mater. Chem. A.*, 2019, 7, 10988.
- [13] L. M. Xu, L. Ma, B. Lin, J. Zhang, W. J. Zhang, *Nanotechnology*, 2019, 30, 415402.
- [14] H. L. Xue, S. Yue, J. Wang, Y. Zhao, Q. Li, M. M. Yin, S. S. Wang, C. H. Feng, Q. Wu, H. S. Li, D. X. Shi, Q. G. Jiao, *J. Electroanal. Chem.*, 2019, 840, 230.
- [15] H. L. Xue, J. Wang, S. S. Wang, M. H. Sohail, C. H. Feng, Q. Wu, H. S. Li, D. X. Shi, Q. G. Jiao, Y. Zhao, *New J. Chem.*, 2018, 42, 15340.
- [16] Q. M. Pan, F. H. Zheng, Y. N. Wu, X. Ou, C. H. Yang, X. H. Xiong, M. L. Liu, *J. Mater. Chem. A.*, 2018, 6, 592.
